# Supplementary material for: An Ethnobotanical Study of Medicinal Plants in Amaya District, South West Shewa Zone of Oromia Regional State, Ethiopia
Source: Research Square preprint supplement (doi:10.21203/rs.3.rs-103981/v1), 2020-11-24
Supplement: Supplementary file 1 [file a3b0b67952be08538cb171fc.docx]

Supplementary file 2: List of medicinal plants used for human and livestock ailments [GF: Growth form, H = herb, T = tree, Sh = shrub, C=climber, L=liana; Ha: habitat , W = wild, HG = home garden, B=both wild and home garden, FL = farmland; Parts used, L = leaf, Fl = flowers, S = seed, RS = root and seed, LR = leaf and root, Sa = sap, R = root, Bu = bulb, Ba = bark, Fu = fruit, St = stem, SFu = seed and fruit, LSt = leaf and stem, La = latex, LFu = leaf and fruit, WP = whole parts, LS = leaf and seed; Cond: condition of preparations, B = both dry and fresh, D = Dry, F=fresh; Used for, Hu = human, Li = livestock].

| Botanical name | Family | GF | Ha | Disease treated | Parts used | Cond. | Mode of preparation and application | Route of administration | Used for |
| --- | --- | --- | --- | --- | --- | --- | --- | --- | --- |
| *Acacia abyssinica*  Hochst. ex Benth | Fabaceae | T | W | Snake poison | L | F | Chewed with leaf of Cynodon dactylon (L.) Pers and spit to affected skin. | Dermal | Hu |
|
| *Taverniera abyssinica A.* | Fabaceae | H | W | Sudden disease | R | B | Chewed and swallowed | Oral | Hu |
| *Acmella caulirhiza*  Del. | Asteraceae | H | W | Tonsillitis | Fl | F | Chewed and squeeze the drops | Oral | Hu |
| *Aframomum corrorima* (Braun) Jansen | Zingiberaceae | H | HG | Stomachache | S | D | Chewed | Oral | Hu |
| *Podocarpus4 falcatus*  (Thunb.) Mirb | Podocarpaceae | T | W | Tooth pain | RS | B | Chewed and brush | Oral | Hu |
| Leeches expulsion | LR | F | Pounded filter juice and drop into cattle nose | Nasal | Li |

Supplementary file 2 Continued…..

| Botanical name | Family | GF | Ha | Disease treated | Parts used | Cond. | Mode of preparation and application | Route of administration | Used for |
| --- | --- | --- | --- | --- | --- | --- | --- | --- | --- |
| *Agave sisalana*  Perrine ex. engl. | Agavaceae | H | B | Shoulder wound | Sa | F | Warmed on fire and putted on the area | Dermal | Li |
| Blackleg | R | F | Crushed added to water and given to cattle | Oral | Li |
| *Ajuga integrifolia*  Buch.Ham. | Lamiaceae | H | W | Malaria | L | F | Pounded, squeezed the juice and drunk. | Oral | Hu |
| Stop breast feeding | L | F | Smashed and rubbed on breast. | Dermal | Hu |
| Blood clotting | L | F | smashed ,squeeze the drop and add on the area | Dermal | Hu |
| Abdominal pain | L | F | Chopped extract liquid and drunk | Oral | Hu |
| *Allium sativum L.* | Alliaceae | H | HG | Cough | Bu |  | Unprocessed bulb is cooked with *Lensculinaris* and drunk the semi-liquid cream. |  |  |
| Malaria | Bu |  | Crushed, boiled with leaf *Thymus schimperi* Ronninger & root of *Zingiber officinale* Roscoe and one cup tea is drunk. |  |  |
| Cold |  |  | Crushed, boiled with *Vicia faba L*. and root of *Zingiber officinale* squeeze the juice and drunk. |  |  |
| Cold |  |  | Pounded mixed with honey and eaten at morning |  |  |
| Sudden disease | Bu |  | Pounded with chill & salt then rubbed on cut parts |  | Li |
| Blood pressure |  |  | Crushed and eaten |  | HU |
| Febrile illness |  |  | Pounded with *Zingiber officinale* then boiled and drunk | Oral |  |
| Stomachache | Bu |  | Chewed and swallowed |  |  |
| Diarrhea | Bu |  | powdered mixed with honey and eaten at morning |  |  |
| Wound | Bu |  | crushed and put on area | Dermal |  |

Appendix 2 Continued…..

| Botanical name | Family | GF | Ha | Disease treated | Parts used | Cond. | Mode of preparation and application | Route of administration | Used for |
| --- | --- | --- | --- | --- | --- | --- | --- | --- | --- |
| *Aloe kefaensis*  Gilbert &Sebsebe | Aloaceae | H | B | Shoulder wound | Sa |  | Warmed on fire and rubbed on affected part of cattle. | Dermal | Li |
| Dandruff | Sa | Extract the sap and wash the head with the fluid | Dermal | Hu |
| *Clerodendrum myricoides (Hochst.)Vatke* | Lamiaceae | Sh | W | Stomachache | R | F | Pounded, filter and drunk | Oral | B |
| *Bersama abyssinica* Fresen. | Melianthaceae | Sh | W | Syphilis | R | B | Chewed and Swallowed or Crushed, boiled & drunk for 5days. | Oral | Hu |
| AScaris | Ba | F | Pounded mixed with honey and eaten |
| *Beta vulgaris* L. | Chenopodiaceae | H | HG | Anemia | R | F | Chopped cooked filter water and drunk | Oral | Hu |
| *Brassica carinata*A. Br. | Brassicaceae | H | FL | Bloat | S | D | Roasted, powdered mixed with water and given to cattle. | Oral | Li |
| *Brassica napus*  Var. | Brassicaceae | H | HG | Constipation | L | F | Cooked added with butter and eaten by injera | Oral | Hu |
| Placenta retention | L | F | Crushed and given to cow | Oral | Li |
| *Brassica nigra* (L.) Koch | Brassicaceae | H | FL | Bloat | S | D | Pounded mixed water and given to cattle | Oral | Li |
| *Brucea antidysenterica* J.F.Mill. | Simaroubaceae | Sh | W | Rabies | L | F | Pounded with leaf of *Phytolacca dodecandra* L,filter the liquid and given to cattle | Oral | Li |
| *Calpurnia aurea*  (Ait.) Benth. | Fabaceae | Sh | W | External parasite | L | F | Pounded squeezed sap is rubbed on skin of calf | Dermal | Li |
| Rabies | L |  | Pounded with seed of *Brucea antidysenterica* filter the drop & given to cattle. | Oral | Li |
| Snake bite | L | F | Pounded and rubbed on affected skin | Dermal | Li |
| Ascaris | S | F | Pounded added to water then filter and drunk | Oral | Hu |

Supplementary file 2 Continued…..

| Botanical name | Family | GF | Ha | Disease treated | Parts used | Cond. | Mode of preparation and application | Route of administration | Used for |
| --- | --- | --- | --- | --- | --- | --- | --- | --- | --- |
| *Capparis tomentosa* Lam. | Capparidaceae | L | W | Tooth pain | Ba | F | Biting the bark | Tooth | Hu |
| Febrile illness | R | F | pounded and sniffed | Nasal |  |
| Evil eye | R | D | Powdere ith root of Ruta chalepensis put on fire and smoke | Nasal | Hu |
| *Capsicum annuum*  L. | Solanaceae | H | HG | Bloat | Fu | D | Powdered mixed with local drink areke and water then given to cattle | Oral | Li |
| Stomachache | Fu | Powdered mixed with water and drink | Oral | HU |
| *Carica papaya* L. | Caricaceae | T | HG | Gastric | L | F | Fresh leaf is crushed, boiled and drunk 1 glass cup in the morning. | Oral | Hu |
| Malaria | Crushed boiled and Drunk |
| *Platostoma rotundifolium (Briq.)A.J.* | Lamiaceae | H | W | Wound and Headache ,Febrile illness | L | F | pounded filter water and drop on affected area,Smashed and sniffed Or squeeze the water and drunk | Dermal, Nasal, Oral | Hu |
| *Catha edulis* (Vahl) Forssk.ex Endl | Celastraceae | Sh | HG | Urine retention | L | F | Pounded with leaf of *Foeniculum vulgare&Ruta chalepensis* added with areke and water then given to cattle | Oral | Li |
| Tonsillitis | L | F | Chewed | Hu |
| *Citrus limon* L. | Rutaceae | Sh | HG | Cough | Fu | F | Squeeze the juice in to tea and drink | Oral | Hu |
| Tonsillitis | Fu |  | Smoke& swallow the juice | Oral |  |
| Stomachache& vomiting | Fu | F | Swallowing the juice And sniffed | Oral |  |
| Dandruff | Fu |  | Broke the fruit then drop the sap on head and rubbed. | Dermal |  |
| Blood clotting | Fu |  | Extract liquid and drop in cut skin | Dermal | Hu |
| Ring worm | Fu |  | Crushed and rubbed on affected area | Dermal |  |
| Blood pressure | Fu | F | Extract juice and drunk | Oral | Hu |

Supplementary file 2 Continued…..

| Botanical name | Family | GF | Ha | Disease treated | Parts used | Cond. | Mode of preparation and application | Route of adm. | Used for |
| --- | --- | --- | --- | --- | --- | --- | --- | --- | --- |
| *Clausena anisata*  (Wild.) Benth. | Rutaceae | Sh | W | Leg swelling | L | F | Crushed boiled and rubbed on affected parts | Dermal | Hu |
| Febrile illness |  | F | Boiled and sniffed | Nasal |  |
| Eye infection | L | F | Boiled and wash with the hot water | Optical | Hu |
| *Clematis simensis*  Fresen | Ranunculaceae | L | W | Gastric | L | F | Crushed, extract water and drunk | Oral | Hu |
| Abdominal parasite | L | F | Pounded mixed with water and given to cattle | Oral | Li |
| *Coffea arabica* L. | Rubiaceae | T | HG | Wound | S | D | Roasted, powdered and added on the cut skin | Dermal | Hu |
| Cough | S |  | boiled with root of *Zingiber officinale* and salt then drunk | Oral | Hu |
| Diarrhea | S | D | Roasted powdered mixed honey and eaten | Oral | Hu |
| *Cordia africana*  Lam. | Boraginaceae | T | W | Spider poison | L | D | Burned the remaining ash is mixed butter and painted on the area | Dermal | Hu |
| *Croton macrostachyus* Del. | Euphorbiaceae | T | W | Eye infection | L | F | Crushed, boiled in water & wash with it. | Oral | Hu |
| Blood clotting | Sa | F | Young stem is cut and drop the sap on cut parts. | Dermal | HU |
| Leg swelling | L | F | Crushed, boiled and rubbed on affected skin. | Dermal | Hu |
| Anthrax | Sa | F | Crushed boiled and drunk | Oral | Li |
| Febrile illness | L | F | Boiled and wash the leg then putted on. | Dermal | Hu |
| Ring worm | L | F | Drop the sap on the affected area and rubbed | Dermal | Hu |
| Tumor | L | F | Smashed and rubbed on affected area | Dermal | Hu |
| Scabies | L | F | Crushed, pounded filter water and putted on the area | Dermal | Hu |
| *Cucurbita pepo* L. | Cucurbitaceae | H | HG | Hook worm | S | D | Soaked in water then chewed and swallowed | Oral | Hu |
| Cophxoo | SFu | B | Cooked and eaten | Hu |

Supplementary file 2 Continued…..

| Botanical name | Family | GF | Ha | Disease treated | Parts used | Cond. | Mode of preparation and application | Route of administration | Used for |
| --- | --- | --- | --- | --- | --- | --- | --- | --- | --- |
| *Cynodon dactylon*  (L.) Pers. | Poaceae | H | W | Snake poison | L | B | Chewed and spit on skin | Derma | Hu |
| *Cynoglossum lanceolatum* Forssk. | Boraginaceae | H | W | Febrile illness | L | F | Extract water then sniffed and drunk | Oral, Dermal | Hu |
| *Datura stramonim*  L. | Solanaceae | H | HG | Evil eye | S | D | Unprocessed seed is putted on fire and sniffed | Nasal | Hu |
| Wound | L | F | Pounded and drop the juice on affected parts | Dermal | Hu |
| Tooth pain | S | D | boiled with butter and smoke | Oral | HU |
| Blood clotting | L | F | Filter water and drop on cut parts | Dermal | Hu |
| *Dodonea angustifolia* L.f. | Sapindaceae | Sh | W | Tonsillitis | R | F | Chewed and squeeze the juice | Oral | Hu |
| *Dovyalis abyssinica*  (A. Rich.) Warb | Flacourtiaceae | Sh | W | Cough | L | F | Boiled and vapour is smoke | Nasal | Hu |
| *Echinops kebericho*  Mesfin | Asteraceae | H | W | Evil eye & febrile illness | R | D | Crushed putted on fire and sniffed/smoked | Nasal | Hu |
| Abdominal pain | St | D | Crushed ,boiled and drunk | Oral | Hu |
| *Ehretia cymosa*  Thonn. | Boraginaceae | T | W | Evil eye | L | F | Pounded, added to water and used wash skin and drunk to cattle. | Oral, Dermal | Li |
| *Ekebergia capensis*  Sparrm | Meliaceae | T | W | Leeches expulsion | Ba | F | Pounded extract water and drop in to cattle nostril | Nasal | Li |
| *Embelia schimper*  *i* Vatke | Ulenaceae | T | W | Tape worm &hook worm | S | F | Crushed, pounded, squeezed the juice and drunk at morning. | Oral | Hu |
|
| *Ensete ventricosum*  Muarelii. | Musaceae | H | HG | Bidu | R | F | Chopped, cooked and eaten. | Oral | Hu |

Supplementary file 2 Continued…..

| Botanical name | Family | GF | Ha | Disease treated | Parts used | Cond. | Mode of preparation and application | Route of administration | Used for |
| --- | --- | --- | --- | --- | --- | --- | --- | --- | --- |
| *Erythrina brucie*  Schweif. | Fabaceae | T | W | External parasite | Ba | F | Pounded mixed with water and wash the skin of cattle | Dermal | Li |
| Cough | LSt | F | Boiled and drunk. | Oral | Hu |
| *Eucalyptus globulus* Labill. | Myrtaceae | T | HG | Nasal bleeding | L | F | Young leaf is smashed and sniffed. | Nasal | Hu |
| Cough and febrile illness |  | Boiled with leaf *of Croton macrostachyus* Del &*Ocimum urticifolium* RothThen smoke the vapour & wash the body | Nasal, Dermal |  |
| Stomachache |  | Crush young leaf and chewed | Oral | Hu |
| Sinus |  | Boiled and smoke the vapors | Nasal | HU |
| Headache | L | Fresh leaf is crushed and putted on the nose | Dermal | Hu |
| *Euclea racemose*  Murr. | Lamiaceae | Sh | W | Internal parasite | R | B | Crushed boiled added with sugar and drunk | Oral | Hu |
| *Euphorbia abyyssinica* Gmel. | Euphorbiaceae | T | W | Tumor | La | F | Painted the latex on affected parts | Dermal | Hu |
| *Euphorbia candelabrum* Kostshy | Euphorbiaceae | T | B | Horse cough | St | D | Crushed, pounded put on fire and sniffed | Nasal | Li |
| *Euphorbia tirucalli*  L. | Euphorbiaceae | T | W | Hemorrhoids | La | F | Milk latex is dropped on affected area | Anal | Hu |
| *Euphoriba depauperata* A.Rich. | Euphorbiaceae | H | W | Tumor | L | F | The latex are painted on affected part | Dermal | Hu |
| *Ficus sur* Forssk. | Moraceae | T | W | Ring worm | Sa | F | Painted on affected area | Dermal | Hu |
| *Ficus vasta* Forssk. | Moraceae | T | W | Hemorrhoid | Sa | F | The sap is creamed with root of *Capparis tomentosa and* painted on area | Anal | Hu |
| *Foeniculum vulgare* Mill. | Apiaceae | H | GH | Bloat & abdominal pain | L | F | Pounded mixed with small amount areke and water then drunk to cattle | Oral | Li |
| Stomachache | L | Boiled and drunk | Oral | Hu |
| *Gardenia ternifolia* | Rubiaceae | T | W | Hemorrhoid | S | D | Roasted putted on the area when its warmed | Dermal | Hu |

Supplementary file 2 Continued…..

| *Lagenaria siceraria* (Molina) Standl. | Cucurbitaceae | H | W | Dandruff | Fu | F | Cooked and rubbed on affected area | Dermal | Hu |
| --- | --- | --- | --- | --- | --- | --- | --- | --- | --- |
| *Girardina diversifolia* (Link) Friss. | Urticaceae | H | W | Fire burn | R | F | Pounded and attached to affected skin. | Dermal | Hu |
| *Guizotia abyssinica*  (L.f.) Cass. | Asteraceae | H | FL | Diarrhea | S | D | Roasted, powdered added with salt and eaten | Oral | Hu |
| *Guizotia scabra*  (Vis.) Chiov. | Asteraceae | H | W | Wound | L | F | Pounded and directly added on the wound of horse and donkey | Dersal | Li |
| *Hagenia abyssinica*  (Brace) J.F.Gmel. | Rosaceae | T | B | Tape worm | S | D | Powdered soaked in water at night and drunk before break feast. | Oral | Hu |
| *Hordeum vulgare* L. | Poaceae | H | FL | Gastric | S | D | Roasted and eaten | Oral | Hu |
| *Hypoestes forskaoli*  (Vahl) Soland. Ex.Roem and Schult. | Acanthaceae | H | W | Sudden disease | RL | F | Pounded extract water and drunk | Oral | Hu |
| Insect poison | L | Crushed then rubbed and tied on wound area |  |  |
| *Juniperus procera*  Hochst.ex Endl. | Cuppressaceae | T | B | Wound | St | D | Warmed on fire and putted on the area | Dermal | Hu |
| *Justicia schimperiana* (Hochst. Ex Nees) T. Anders. | Acanthaceae | Sh | W | Swelling leg | L | F | Crrushed boiled with leaf of Croton macrostachyus and Clausena anisata and used to wash and rubbed affected parts. | Dermal | Hu |
| Wound | Crushed boiled then wash and putted on the area | Dermal | Hu |
| Insect poison | Smashed and tied to affected area | Dermal | Hu |
| *Kalanchoe mamorata* Bak. | Crassulaceae | H | W | Shoulder swelling | R | F | Crushed and attached on shoulder of bull. | Dermal | Li |
| Broken bone | L |  | Putted on fire/boiled attached on the area | Dermal | B |
| Wound | L | F | Warmed and putted on. | Dermal | Hu |

Supplementary file 2 Continued…..

| Botanical name | Family | GF | Ha | Disease treated | Parts used | Cond. | Mode of preparation and application | Route of administration | Used for |
| --- | --- | --- | --- | --- | --- | --- | --- | --- | --- |
| *Lens culinaris* | Fabaceae | H | FL | Spider poison | S | D | Chewed and spit on affected skin | Dermal | Hu |
| *Lepidium sativum*  L. | Brassicaceae | H | FL | Bloat | S | D | Powdered with salt mixed to water and given to cattle | Oral | Li |
| Ear infection | S | D | Boiled filter and drop in to ear | Ear | Hu |
| Wound | S | D | Powdered mixed with butter and painted on the area | Dermal | Hu |
| Stomachache | S | D | Powdered added to water and drunk | Oral | Hu |
| *Leucas martinicensis* (Jacq.) R. Br. | Lamiaceae | Sh | B | Stomachache | L | F | Crushed and chewed | Oral | Hu |
| *Linum usitatissimum* L. | Linaceae | H | FL | Retained placenta | S | D | Boiled and given to cattle. | Oral | Li |
| Leeches elimination |  |  | Pill outer cover and added to lake. | B |
| Gastric&constipation | S | D | Soaked in hot water at night and mixed with sugar then drunk at morning | Hu |
| Bloat | S | D | Powdered mixed with water and given to cattle | Li |
| *Var adoensis*  Hochst.ex Walp. | Verbaceae | H | W | Ring worm | L | F | Smashed and rubbed on skin | Dermal | Hu |
| Tonsillitis | L | D | Pounded with leaf of *Thymus schimperi* boiled and drunk | Oral | Hu |
| *Lycopersicon esculentum* | Solanaceae | H | HG | Spider poison | L | F | Chewed & spit to affected part. | Dermal | Hu |
| *Maesa lanceolata*  Forssk. | Measaceae | T | W | Elephantiasis | Ba | F | Pounded mixed with butter and painted on area | Dermal | Hu |
| *Moringa oleifera*  Lam. | Moringaceae | T | HG | Blood pressure | L | B | Cooked and eaten /boiled as a tea and drunk | Oral | Hu |
| *Mulas domestics* | Rosaceae | T | HG | Heart disease | Fu | F | Wash and eat the raw | Oral | Hu |

Supplementary file 2 Continued…..

| Botanical name | Family | GF | Ha | Disease treated | Parts used | Cond. | Mode of preparation and application | Route of administration | Used for |
| --- | --- | --- | --- | --- | --- | --- | --- | --- | --- |
| *Nicotiana tabacum*  L. | Solanaceae | H | HG | Leeches explosion | L | B | Chewed and spit to cattle nostril. | Nasal | Li |
| Snake bite | L | F | pounded filter juice and drunk | Oral | Hu |
| Bloat | L | F | pounded and drunk to cattle | Oral | Li |
| Tooth pain |  | F | Chewed and putted on the area | Tooth | Hu |
| Eye infection |  | B | Chewed and spit to cattle eye | Optica | Li |
| Cough | L | F | Pounded , extract water and smoke | Nasal | Hu |
| *Nigalle sativa* L. | Ranunculaceae | H | HG | Stomachache | S | D | chewed and swallowed | Oral, Dermal | Hu |
| Tonsillitis | S | D | chewed and spit on child head |
| *Ocimum lamiifolium* Hochst. ex.Benth. | Lamiaceae | Sh | W | Febrile illness | L | F | Extract the water drink and sniffed. | Nasal, Oral | Hu |
| Cough | L |  | Smashed and sniffed | Nasal |  |
| Headache | L |  | Smashed and sniffed. | Nasal |  |
| Hemorrhoid & tooth pain | L | F | extract the liquid and drop on affected area  Crushed and attached on the area | Anal  Tooth | Hu |
| *Galium aparine* | Rubiaceae | H | W | Bloat | WP | F | Pounded mixed with water and drunk to cattle. | Oral | Li |
| *Olea europaea*  L. subsp.cupidata | Oliaceae | T | B | Eczema/tinea corporis | St | D | Crushed extract oil mixed with butter and painted on affected area | Dermal | Hu |
| *Olinia rochetiana*  A.Juss. | Oliniaceae | T | W | Tooth pain | St | F | Young stem is used to brush tooth | Tooth | Hu |
| *Osyris quadripartite* Decn. | Santalaceae | T | W | Febrile illness | L | F | Crushed, boiled and wash the body. | Dermal | Hu |
| Abortion | L | F | Pounded extract water and drunk | Oral | Hu |
| *Periploca linearifolia* Quart-Dill. $ A.Rich. | Asclepiaceae | L | W | Tumor | La | F | Crushed and white cream is painted on area | Dermal | Hu |

Supplementary file 2 Continued…..

| Botanical name | Family | GF | Ha | Disease treated | Parts used | Cond. | Mode of preparation and application | Route of administration | Used for |
| --- | --- | --- | --- | --- | --- | --- | --- | --- | --- |
| *Persea americana*  L. | Lauraceae | T | HG | Dandruff | Fu | F | Crushed and painted on area and wash | Dermal | Hu |
| Gastric | Crushed and eaten | Dermal | Hu |
| *Phytolacca dodecandra* L.Her. | Phytolaccaceae | L | W | Rabies | L | F | Pounded, squeeze the juice mixed with honey and eaten. | Oral | Hu |
| Rabies | L |  | Pounded mixed with milk and given to dog. | Oral | Li |
| Leeches | L |  | Pounded squeeze the juice and drop to cattle nostril. | Nasal | Li |
| Bloat | L |  | Powdered mixed with water & areke and given to cattle. | Oral | Li |
| Sinus | LR |  | Squeeze the juice and smoke | Nasal | Hu |
| Abortion | R | F | pounded squeeze the juice and drunk | Oral | Hu |
| Scabies | L | F | Pounded and rubbed on affected skin | Dermal | Hu |
| *Piper nigrum* | Piperaceae | H | HG | Eye infection | LFu | F | Chewed and spit on | Optica | Li |
| *Plantago lanceolata* L. | Plantaginaceae | H | W | Blood clotting | Fl | F | Smashed and added to cut parts. | Dermal | Hu |
| *Prunus persica* (L.) Batsch | Rosaceae | T | W | Wound | Ba | F | Pounded then added on wound of horse, donkey and mule | Dermal | Li |
| Febrile illness | L |  | Crushed boiled and use to wash body | Dermal | Hu |
| Wound | L | F | Pounded and directly added to wound of donkey | Dermal | Li |
| *Rhamnus prynoides* L.Herit. | Rhamnaceae | Sh | HG | Hepatitis | L | D | Pounded and rubbed on affected area | Optica | Hu |
| Tonsillitis | LFu | F | Chewed | Oral | Hu |
| *Ricinus communis*  L. | Euphorbiaceae | Sh | W | Bloat | R | F | Root is pounded mixed with water & drunk to cattle. | Oral | Li |
| Anthrax | S | D | Powdered mixed with water and drunk to cattle. | Oral | Li |
| *Rosa abyssinica* | Rosaceae | Sh | W | Insect poison | L | F | Chewed and spit on area | Dermal | Li |

Supplementary file 2 Continued…..

| Botanical name | Family | GF | Ha | Disease treated | Parts used | Cond. | Mode of preparation and application | Route of administration | Used for |
| --- | --- | --- | --- | --- | --- | --- | --- | --- | --- |
| *Rubia cordifolia* | Rubiaceae | H | W | Insect poison | L | F | Crushed and attached on area | Dermal | Hu |
| *Rumex nepalensis*  Spreng. | Polygonaceae | H | W | Tumor Or warts | L | F | Smashed and rubbed on affected parts | Dermal | Hu |
| Tonsillitis | R | F | chewed and spit to child mouth | Oral | Hu |
| *Rumex nervosus*  Vahl | Polygonaceae | Sh | W | Hemorrhoid | Sa | F | Drop the sap on the area and rubbed | Anal | Hu |
| *Ruta chalepensis* L. | Rutaceae | H | HG | Rabies and bloat | L | F | Pounded with leaf of *Brucea antidysenterica* filter the drop and given to cattle. | Oral | Li |
| Stomachache |  |  | Chewed and swallowed | Oral | Hu |
| Cough |  |  | Boiled with tea and drunk | Oral | Hu |
| Abdominal pain |  |  | Crushed boiled and drunk to child. |  | Hu |
| Ascaris | L | F | Crushed boiled and drunk | Oral | Hu |
| *Sacchharum afficinarum* L. | Poaceae | Sh | HG | Cough | St | F | Fresh stem is warmed on fire and eaten. | Oral | Hu |
| Gastric | St | Raw stem is eaten at morning |
| *Senna didymobotrya* (Fresen.) Irwin& Barneby. | Fabaceae | Sh | W | Insect poison | L | F | Pounded and attached on the area | Dermal | Li |
| *Senna occidental*  *s* L. | Fabaceae | Sh | W | Insect poison | L | F | Pounded and attached on the area | Dermal | Li |
| Hemorrhoid | L | F | Crushed and attached on the area at night | Dermal | Hu |
| *Solanecio gigas*  (Vatke.) C. Jeffery. | Asteraceae | Sh | W | Febrile illness | L | F | Smashed and rubbed the body | Dermal | Hu |
| Rabies | Fresh is boiled and drunk |  |  |
| *Solanum incanum*  L. | Solanaceae | H | W | Tonsillitis | Fu | F | Fruit liquid is rinsed with balled cotton stick tip and rolled on tonsillitis. | Oral | Hu |
| Nasal bleeding | L | L | smashed and smoked | Nasal | Hu |
| *Solanum dasyphllum* Schumach. | Solanaceae | Sh | W | External parasite | Fu | F | Broke and rubbed on skin of calf | Dermal | Li |
| Stomachache | R | F | Chewed | Oral | Hu |

Supplementary file 2 Continued…..

| *Stephania abyssinica* (Dillon $ A. Rich.) Walp. | Mensipermaceae | H | W | Wound | Fu | F | Chewed and put on area | Dermal | Hu |
| --- | --- | --- | --- | --- | --- | --- | --- | --- | --- |
|
| *Stereosperm umkunthianum* Cham. | Bignoniaceae | T | W | Wound(ora) | L | F | Pounded, squeeze the juice then drunk and wash the body. | Oral, Dermal | Li |
| Internal parasite | L | F | Crushed powdered and drunk | Oral | Li |
| *Thymus schimperi* Ronninger. | Lamiaceae | H | W | Cough | L | D | Smashed boiled with sugar and drunk | Oral | Hu |
| Constipation |  | D | boiled mixed with butter and drunk |  |  |
| Stomachache | L | F | Chewed | Oral | Hu |
| Blood pressure | L | D | Roasted, boiled and drunk | Oral | Hu |
| *Trigonella foenum*-graecum L. | Fabaceae | H | Hg | Gastric | S | D | Soaked in water at night and drunk in the morning | Oral | Hu |
| *Urtica simensis* Steudel | Urticaceae | H | W | Nasal bleeding | L | F | Smashed and sniffed | Nasal | Hu |
| Gastric | L | F | Crushed cooked and eaten | Oral |
| *Verbascum sinaticum* L. | Scrophulariaceae | H | W | Wound | WP | F | Crushed ,boiled and wash the on affected area | Dermal | Hu |
| *Vernonia amygdalina* Del. | Asteraceae | T | B | Increase milk | L | F | Crushed, pounded added to salt and given to cow. | Oral | Li |
| Tape worm and hook worm | L | F | Pound added to water and drunk |  | Hu |
| Tonsillitis | L | F | Chewed and swallow the squeezed drop. | Oral | Hu |
| Stomachache |  |  | Chewed and swallow the squeezed drop. |  | Hu |
| Abdominal pain |  |  | Extract the water and drink/eat the stem |  | Hu |
| Bloat | L | F | Pounded mixed with water and given to cattle | Oral | Li |
| Hemorrhoid | St |  | Pounded extract water wash the affected part | Anal | Hu |
| Gastric | LS | F | Fresh stem are chewed | Oral | Hu |
| Stop breast feeding | L | F | Smashed and painted on breast | Dermal | Hu |

Supplementary file 2 Continued…..

| Botanical name | Family | GF | Ha | Disease treated | Parts used | Cond. | Mode of preparation and application | Route of administration | Used for |
| --- | --- | --- | --- | --- | --- | --- | --- | --- | --- |
| *Vernonia auriculifera* Hiem. | Asteraceae | T | W | Bloat | L | F | Pounded mixed with water and drunk to cattle | Oral | Li |
| Blood Clotting | L | F | Extract water and drop on cut skin | Dermal | Hu |
| *Vicia faba* L. | Fabaceae | H | FL | Cough | S | D | Crushed boiled with chill and drunk | Oral | Hu |
| *Withania somnifera*  (L.) Dunal | Solanaceae | Sh | W | Headache | S | F | Smashed and sniffed | Nasal | Hu |
| Evil eye | S | D | Put on fire and smoke | Nasal | Hu |
| Sudden disease | S | F | Pounded filter water and drunk | Oral | Hu |
| Febrile illness | StL | D | Put on fire and smoke | Nasal | Hu |
| *Zeheria Scabra*  (L.F). | Cucurbitaceae | H | W | Leg swelling | L S | F | crushed, boiled and wash and rubbed affected parts | Dermal | Hu |
| Hepatitis |  |  | Smashed and rubbed on the area. | Optical | Hu |
| Rabies | L | F | Extract water and drunk | Oral | Hu |
| *Zingiber officinale*  Roscoe | Zingiberaceae | H | HG | Stomachache | R | F | Pounded boiled and drunk/Chewed | Oral | Hu |
| Tonsillitis | R | F | Chewed | Oral | Hu |
| Cough | R | F | crushed boiled with tea & drunk | Oral | Hu |
