# Supplementary material for: An Ethnobotanical Study of Medicinal Plants in Amaya District, South West Shewa Zone of Oromia Regional State, Ethiopia
Source: Research Square preprint supplement (doi:10.21203/rs.3.rs-103981/v1), 2020-11-24
Supplement: Supplementary file 2 [file bf2971901990109fe2841360.docx]

Supplementary 1: List of families and their number of genera and species of MPs in Amaya District

| Families | Number of MP species | Percentages (%) | Families | Number of MP species | Percentages (%) |
| --- | --- | --- | --- | --- | --- |
| Asteraceae | 9 | 8.03 | Calestraceae | 1 | 0.89 |
| Fabaceae | 9 | 8.03 | Caricaceae | 1 | 0.89 |
| Solanaceae | 8 | 7.14 | Capparidaceae | 1 | 0.89 |
| Lamiaceae | 7 | 6.25 | Chenopodiaceae | 1 | 0.89 |
| Euphorbiaceae | 6 | 5.35 | Crassulaceae | 1 | 0.89 |
| Rosaceae | 5 | 4.46 | Cupressaceae | 1 | 0.89 |
| Brassicaceae | 4 | 3.57 | Flacourtiaceae | 1 | 0.89 |
| Boraginaceae | 3 | 2.67 | Lauraceae | 1 | 0.89 |
| Cucurbitaceae | 3 | 2.67 | Linaceae | 1 | 0.89 |
| Poaceae | 3 | 2.67 | Measacaee | 1 | 0.89 |
| Rubiaceae | 3 | 2.67 | Meliaceae | 1 | 0.89 |
| Rutaceae | 3 | 2.67 | Melianthaceae | 1 | 0.89 |
| Acanthaceae | 2 | 1.78 | Mensipermaceae | 1 | 0.89 |
| Moraceae | 2 | 1.78 | Moringaceae | 1 | 0.89 |
| Polygonaceae | 2 | 1.78 | Musaceae | 1 | 0.89 |
| Ranunculaceae | 2 | 1.78 | Myrtaceae | 1 | 0.89 |
| Urticaceae | 2 | 1.78 | Phytolaceae | 1 | 0.89 |
| Zingiberaceae | 2 | 1.78 | Piperaceae | 1 | 0.89 |
| Agavaceae | 1 | 0.89 | Plantaginaceae | 1 | 0.89 |
| Alliaceae | 1 | 0.89 | Poaceae | 1 | 0.89 |
| Aloaceae | 1 | 0.89 | Podocarpaceae | 1 | 0.89 |
| Apiaceae | 1 | 0.89 | Rhamnaceae | 1 | 0.89 |
| Asclepiaceae | 1 | 0.89 | Oliniaceae | 1 | 0.89 |
| Bignoniaceae | 1 | 0.89 | Oliaceae | 1 | 0.89 |
| Santalaceae | 1 | 0.89 | Sapindaceae | 1 | 0.89 |
| Scrophulariaceae | 1 | 0.89 | Simaroubaceae | 1 | 0.89 |
| Ulenaceae | 1 | 0.89 | Verbaceae | 1 | 0.89 |
